# Supplementary material for: Eveningness and distinctness of the circadian rhythm in men are related to altered neural responses to gain and loss
Source: Research Square preprint supplement (doi:10.21203/rs.3.rs-5093374/v1), 2025-04-24
Supplement: Supplementary file 1 [file ec8fd75e3e173f65282da973.docx]

**Supplementary data**

**Supplementary Table S1** The Ordinary Least Squares (OLS) regression results for distinctness and eveningness as predictor variables. Results were corrected for multiple comparisons using False Discovery Rate (FDR). Statistically significant correlations (at the p<0.05 level) are bolded and underlined, trend-level associations (p<0.1) are underlined. Psychometric parameters were assessed using the Sensitivity to Punishment and Sensitivity to Reward Questionnaire (SPSRQ), NEO-Five Factor Inventory (NEO-FFI), Generalized Anxiety Disorder (GAD-7), Positive and Negative Affect Schedule (PANAS). For details, see: Methods. Abbreviations: FDR – False Discovery Rate, CI – confidence interval, D-W – Durbin-Watson statistics, B-P – Breusch-Pagan statistics.

|  | **coef** | **Std err** | **t** | **P>|t| (FDR corrected)** | **95% CI**  **[0.025; 0.975]** |
| --- | --- | --- | --- | --- | --- |
| **Age** (R2 = 0.086, F = 1.595, p = 0.218)  D-W = 2.694, B-P = 0.0975, B-P p-value = 0.952 | | | | | |
| Distinctness | 0.1861 | 0.112 | 1.666 | 0.105 | -0.041; 0.413 |
| Eveningness | -0.0518 | 0.074 | -0.704 | 0.487 | -0.202; 0.098 |
| **Sensitivity to punishment** (R2 = 0.228, F = 5.027, p = 0.0122)  D-W = 1.801, B-P = 2.235, B-P p-value = 0.327 | | | | | |
| Distinctness | 0.4032 | 0.164 | 2.457 | 0.019 (0.088) | 0.070; 0.737 |
| Eveningness | -0.2263 | 0.108 | -2.091 | 0.044 (0.156) | -0.446; -0.006 |
| **Sensitivity to reward** (R2 = 0.078, F = 1.431, p = 0.253)  D-W = 1.746, B-P = 3.107, B-P p-value = 0.211 | | | | | |
| Distinctness | 0.1449 | 0.091 | 1.595 | 0.120 (0.274) | -0.040; 0.329 |
| Eveningness | 0.0304 | 0.060 | 0.507 | 0.615 (0.821) | -0.091; 0.152 |
| **Neuroticism** (R2 = 0.096, F = 1.808, p = 0.0.179)  D-W = 1.953, B-P = 0.290, B-P p-value = 0.865 | | | | | |
| Distinctness | 1.3615 | 0.379 | 3.590 | **0.001 (0.016)** | 0.591; 2.132 |
| Eveningness | 0.0963 | 0.250 | 0.385 | 0.703 (0.865) | -0.412; 0.605 |
| **Extraversion** (R2 = 0.279, F = 6.578, p = 0.00385)  D-W = 2.235, B-P = 1.469, B-P p-value = 0.480 | | | | | |
| Distinctness | 0.1530 | 0.398 | 0.385 | 0.703 (0.865) | -0.656; 0.962 |
| Eveningness | 0.4849 | 0.262 | 1.847 | 0.073 (0.217) | -0.048; 1.018 |
| **Openness** (R2 = 0.186, F = 3.875, p = 0.0305)  D-W = 2.212, B-P = 0.966, B-P p-value = 0.617 | | | | | |
| Distinctness | 0.8870 | 0.337 | 2.634 | 0.013 (0.067) | 0.203; 1.571 |
| Eveningness | 0.1793 | 0.222 | 0.807 | 0.425 (0.648) | -0.272; 0.631 |
| **Agreeableness** (R2 = 0.049, F = 0.8793, p = 0.424)  D-W = 2.121, B-P = 1.383, B-P p-value = 0.501 | | | | | |
| Distinctness | 0.5156 | 0.391 | 1.319 | 0.196 (0.418) | -0.279; 1.310 |
| Eveningness | -0.0470 | 0.258 | -0.182 | 0.857 (0.914) | -0.571; 0.477 |
| **Conscientiousness** (R2 = 0.057, F = 1.025, p = 0.370)  D-W = 1.890, B-P = 8.944, B-P p-value = 0.011 | | | | | |
| Distinctness | -0.4100 | 0.407 | -1.008 | 0.321 (0.577) | -1.237; 0.417 |
| Eveningness | -0.2630 | 0.268 | -0.980 | 0.334 (0.577) | -0.808; 0.282 |
| **GAD** (R2 = 0.021, F = 0.3649, p = 0.697)  D-W = 1.862, B-P = 1.389, B-P p-value = 0.499 | | | | | |
| Distinctness | 0.1478 | 0.182 | 0.810 | 0.423 (0.648) | -0.223; 0.518 |
| Eveningness | -0.0360 | 0.120 | -0.299 | 0.767 (0.909) | -0.280; 0.208 |
| **Positive affect** (R2 = 0.013, F = 0.2155, p = 0.807)  D-W = 2.528, B-P = 0.207, B-P p-value = 0.902 | | | | | |
| Distinctness | -0.0126 | 0.376 | -0.033 | 0.974 (0.973) | -0.777; 0.752 |
| Eveningness | -0.1623 | 0.248 | -0.654 | 0.517 (0.720) | -0.667; 0.342 |
| **Negative affect** (R2 = 0.088, F = 1.645, p = 0.208)  D-W = 1.923, B-P = 2.533, B-P p-value = 0.282 | | | | | |
| Distinctness | 0.5375 | 0.298 | 1.804 | 0.080 (0.217) | -0.068; 1.143 |
| Eveningness | -0.0505 | 0.197 | -0.257 | 0.799 (0.913) | -0.450; 0.349 |
| **BAS Drive** (R2 = 0.014, F = 0.2368, p = 0.790)  D-W = 2.388, B-P = 2.255, B-P p-value = 0.324 | | | | | |
| Distinctness | -0.0990 | 0.150 | -0.660 | 0.513 (0.720) | -0.404; 0.206 |
| Eveningness | 0.0215 | 0.099 | 0.217 | 0.829 (0.914) | -0.180; 0.223 |
| **BAS Fun seeking** (R2 = 0.081, F = 1.493, p = 0.239)  D-W = 1.753, B-P = 7.596, B-P p-value = 0.022 | | | | | |
| Distinctness | 0.0081 | 0.091 | 0.090 | 0.929 (0.959) | -0.176; 0.192 |
| Eveningness | 0.1030 | 0.060 | 1.721 | 0.094 (0.232) | -0.019; 0.225 |
| **BAS Reward** (R2 = 0.066, F = 1.199, p = 0.314)  D-W = 2.511, B-P = 1.959, B-P p-value = 0.376 | | | | | |
| Distinctness | 0.1335 | 0.139 | 0.962 | 0.343 (0.577) | -0.149; 0.416 |
| Eveningness | -0.1142 | 0.092 | -1.247 | 0.221 (0.442) | -0.300; 0.072 |
| **BIS** (R2 = 0.297, F = 7.191, p = 0.00249)  D-W = 1.462, B-P = 1.509, B-P p-value = 0.470 | | | | | |
| Distinctness | 0.6283 | 0.195 | 3.220 | **0.003 (0.023)** | 0.232; 1.025 |
| Eveningness | -0.2724 | 0.129 | -2.117 | 0.042 (0.157) | -0.534; -0.011 |
| **Attention deficits** (R2 = 0.238, F = 5.296, p = 0.00995)  D-W = 2.083, B-P = 2.727, B-P p-value = 0.256 | | | | | |
| Distinctness | 1.3589 | 0.513 | 2.648 | 0.012 (0.067) | 0.316; 2.402 |
| Eveningness | 0.6078 | 0.338 | 1.796 | 0.081 (0.217) | -0.080; 1.296 |

**Supplementary Table S2**. Results of the re-conducted neuroimaging analyses – excluding 3 participants, who obtained Athens Insomnia Scale values higher than 10, which indicated potential chronic sleep deprivation. Abbreviations: B, bilateral.

a Whole-brain analysis corrected for multiple comparisons with cluster-level family-wise error rate approach.
b Region-of-interest analysis.

| **Contrast** | **MNI (x, y, z)** | **Area** | **Voxels** | **Statistics** | ***p*-value** |
| --- | --- | --- | --- | --- | --- |
| Loss anticipation > implicit baseline | 0, 24, 62 | B superior frontal gyrus  B supplementary motor area | 268 | Z = 3.42 | 0.029a |
| Loss anticipation >  win anticipation | 0, -17, -14 | B ventral tegmental area | 32 | T = 2.899 | 0.007b |

**Supplementary Table S3**. Linear mixed mode (LMM) results for behavioral measurements during Monetary Incentive Delay task. Median reaction times for each trial type (all trials, big win trials, small win trials, big loss trials, small loss trials) were treated as dependent variables. Statistical analyses of reaction times were conducted by fitting a linear mixed-effects model (LMM) with two predictors: distinctness and eveningness. LMM accounts for both fixed effects (circadian characteristics) and random effects (participant-specific variability). We found statistically significant positive association between distinctness and reaction time in big win trials (p<0.001), as well as negative association between distinctness and small win trials (p<0.001), big loss trials (p=0.013).

|  | **coef** | **Std err** | **z** | **P>|z|** | **95% CI**  **[0.025; 0.975]** |
| --- | --- | --- | --- | --- | --- |
| **Reaction time – big win trials (+5 PLN)** | | | | | |
| Distinctness | -0.695 | 0.167 | -4.153 | **<0.001** | -1.022; -0.367 |
| Eveningness | 1.295 | 1.088 | 1.191 | 0.234 | -0.837; 3.428 |
| **Reaction time – small win trials (+1 PLN)** | | | | | |
| Distinctness | 0.808 | 0.212 | 3.806 | **<0.001** | 0.392; 1.225 |
| Eveningness | 1.626 | 1.079 | 1.507 | 0.132 | -0.488; 3.741 |
| **Reaction time – big loss trials (-5 PLN)** | | | | | |
| Distinctness | 1.281 | 0.516 | 2.480 | **0.013** | 0.268; 2.293 |
| Eveningness | 1.278 | 0.818 | 1.563 | 0.118 | -0.325; 2.880 |
| **Reaction time – small loss trials (-1 PLN)** | | | | | |
| Distinctness | 0.751 | 1.560 | 0.481 | 0.630 | -2.307; 3.809 |
| Eveningness | 1.334 | 1.031 | 1.293 | 0.196 | -0.688; 3.355 |
